# Supplementary material
Source: PubMed Central journal article supplement (PMC4920709)
Supplement: NIHMS782782-supplement-308811R1_Acknowledgment_Permissions.pdf [file NIHMS782782-supplement-308811R1_Acknowledgment_Permissions.pdf]

## Circulation Research

---

**From:** Cathleen Moscibrocki <moscibro@ohsu.edu>  
**Sent:** Thursday, April 21, 2016 6:33 PM  
**To:** circulation.research@circresearch.com  
**Subject:** CIRCRES/2016/308811 acknowledgement permission

[CIRCRES/2016/308811](#)

I give permission to be acknowledged in the above submitted manuscript. Thank you!

Sincerely,  
Cathleen Moscibrocki

## Circulation Research

---

**From:** Carol Marsh <marshc@ohsu.edu>  
**Sent:** Friday, April 22, 2016 9:16 PM  
**To:** circulation.research@circresearch.com  
**Cc:** Hagai Tavori  
**Subject:** CIRCRES/2016/308811 - please acknowledge Carol Marsh

**Importance:** High

Circulation Research,

I am giving my permission to acknowledge my name in the following manuscript: CIRCRES/2016/308811.

Sincerely,  
Carol M. Marsh, MT(ASCP)  
OHSU Lipid Laboratory

---

**From:** Hagai Tavori  
**Sent:** Thursday, April 14, 2016 10:32 AM  
**To:** Carol Marsh  
**Subject:** Acknowledgment for your help with our Circ Res manuscript

Carol,

We would like to acknowledge your help in collecting the data for our manuscript submitted to Circulation Research.  
Please send an email to: [circulation.research@circresearch.com](mailto:circulation.research@circresearch.com) citing your permission to be acknowledged in manuscript [CIRCRES/2016/308811](#)

Please do so ASAP and copy me on that email.

Thanks

Hagai Tavori, Ph.D | **Assistant Professor**  
Knight Cardiovascular Institute  
Oregon Health & Science University  
Mail Code HRC-5N | HRC510  
3181 S.W. Sam Jackson Park Road  
Portland, OR 97239-3098  
PH (503)418-2685
